# Supplementary material for: Postoperative Thromboembolism According to the Type of Surgery: A Nationwide Study in the Republic of Korea
Source: MDPI journal article supplement (doi:10.3390/jcm11061477), 2022-03-08
Supplement: s1 [file s1]

## Supplementary Materials

**Table S1. Classification codes for type of each surgery**

| No. | Surgery item                                                 | Classification code(s)                                                                                                                                                                                                                                                                                                |
|-----|--------------------------------------------------------------|-----------------------------------------------------------------------------------------------------------------------------------------------------------------------------------------------------------------------------------------------------------------------------------------------------------------------|
| 1   | Cataract surgery                                             | S5110, S5111, S5112, S5116, S5117 S5118, S5119                                                                                                                                                                                                                                                                        |
| 2   | Tonsillectomy                                                | Q2300, Q2310                                                                                                                                                                                                                                                                                                          |
| 3   | Transluminal coronary angioplasty without insertion of stent | M6551, M6552, M6571, M6572                                                                                                                                                                                                                                                                                            |
| 4   | Transluminal coronary angioplasty with insertion of stent    | M6561, M6562, M6563, M6564, *M6565, *M6566, *M6567                                                                                                                                                                                                                                                                    |
| 5   | Coronary artery bypass graft                                 | O1641, O1642, O1647, OA641, OA642 OA647, *O1640, *O1648, *O1649, *OA640, *OA648, *OA649                                                                                                                                                                                                                               |
| 6   | Cardiac catheterization                                      | E7211, E7215, E7216, E7217, E7218 E7311, E7312, E7313, E7314, E7315 E7316, *E0720, *E0721, *E0722, *E0723, *E0724, *E0725, *E0726, *E0727, *E0728, *E0729                                                                                                                                                             |
| 7   | Operation for varicose vein                                  | O0261, O0262, O0263, O0264, O0265, O0266, O0267, O2052                                                                                                                                                                                                                                                                |
| 8   | Appendectomy                                                 | Q2861, Q2862, Q2863                                                                                                                                                                                                                                                                                                   |
| 9   | Operation for cardiac pacemaker                              | O0203, O0204, O0205, O0206, O0207, O0208, O0209, O0210, O2001, O2002, O2004, O2005                                                                                                                                                                                                                                    |
| 10  | Cholecystectomy                                              | Q7380, Q7410                                                                                                                                                                                                                                                                                                          |
| 11  | Endoscopic or percutaneous biliary procedure                 | Q7761, Q7762, Q7763, Q7764, Q7765 Q7766, Q7767, Q7771, Q7772, Q7773 Q7774, Q7775, Q7776                                                                                                                                                                                                                               |
| 12  | Repair of inguinal hernia                                    | Q7761, Q7762, Q7763, Q7764, Q7765 Q7766, Q7767, Q7771, Q7772, Q7773 Q7774, Q7775, Q7776                                                                                                                                                                                                                               |
| 13  | Transurethral prostatectomy                                  | R3975, R3977                                                                                                                                                                                                                                                                                                          |
| 14  | Open prostatectomy                                           | R3950, R3960, RZ512                                                                                                                                                                                                                                                                                                   |
| 15  | Hysterectomy                                                 | R4073, R4074, R4130, R4143, R4144, R4145, R4146, R4154, R4155, R4183, R4202, R4203, R4221, R4223, R4250, R4427, R4428, R4482                                                                                                                                                                                          |
| 16  | Cesarean section                                             | R4514, R4516, R4517, R4518, R4519 R4520, R4507, R4508, R4509, R4510, R5001, R5002                                                                                                                                                                                                                                     |
| 17  | Hip replacement                                              | N0711, N1711, N0715, N1715, N2070, N2710, N3710, N4710                                                                                                                                                                                                                                                                |
| 18  | Total knee replacement                                       | N2072, N2077                                                                                                                                                                                                                                                                                                          |
| 19  | Partial excision of mammary gland                            | N7121, N7122, N7133, N7134, *N7136, *N7137                                                                                                                                                                                                                                                                            |
| 20  | Total mastectomy                                             | N7131, N7132, N7135, *N7130, *N7138, *N7139                                                                                                                                                                                                                                                                           |
| 21  | Skull base surgery                                           | S4801, S4802, S4803                                                                                                                                                                                                                                                                                                   |
| 22  | Brain tumor surgery                                          | S4633, S4634, S4635, S4636, S4637 S4743, *S4638, *S4639                                                                                                                                                                                                                                                               |
| 23  | Gastrectomy                                                  | Q0251, Q0252, Q0253, Q0254, Q0255 Q0256, Q0257, Q0258, Q2533, Q2534, Q2536, Q2537, Q2594 Q2598                                                                                                                                                                                                                        |
| 24  | Partial hepatectomy                                          | Q7221, Q7222, Q7223, Q7224                                                                                                                                                                                                                                                                                            |
| 25  | Hepatic artery embolization                                  | M6644                                                                                                                                                                                                                                                                                                                 |
| 26  | Thyroidectomy                                                | P4551, P4552, P4553, P4554, P4558 P4561, P4565                                                                                                                                                                                                                                                                        |
| 27  | Cardiac surgery (except coronary artery bypass graft)        | O1671, O1672, O1680, O1701, O1702, O1703, O1704, O1705 O1710, O1711, O1721, O1723, O1740 O1750, O1760, O1770, O1781, O1782, O1783, O1791, O1792, O1793, O1794 O1795, O1796, O1797, O1798, O1800, O1810, O1821, O1822, O1823, O1824 O1825, O1826, O1840, O1841, O1850, O1861, O1873, O1874, O1875, O1878, O1879, O1960 |

|    |                                 |                                                                                                                                                                                           |
|----|---------------------------------|-------------------------------------------------------------------------------------------------------------------------------------------------------------------------------------------|
| 28 | Cleft lip and/or palate surgery | Q2161, Q2162, Q2191, Q2192, Q2193 Q2194                                                                                                                                                   |
| 29 | Operation for hemorrhoid        | Q3012, Q3013, Q3014, Q3015, Q3016 Q3017                                                                                                                                                   |
| 30 | Endoscopic spine surgery        | N1494<br>N0303, N0444, N0445, N0446, N0447, N0451, N0452,<br>N0453, N0466, N0468, N0469, N0471, N0472, N0473,<br>N0474, N0480, N0500, N0630, N1491, N1492, N1493,<br>N1495, N1496, N1497, |
| 31 | Spine surgery                   | N1498, N1499, N2461, N2462, N2463, N2464, N2465,<br>N2466, N2467, N2468, N2469, N2470, N2471, N2472,<br>N2491, N2492                                                                      |
| 32 | Endoscopic sinus surgery        | O0967, O0968, O1011, O1022, O1051 O1101, O1121, O1131,<br>O1141, O1151 O1161, O1171, O1176, O1181                                                                                         |
| 33 | Sinus surgery                   | O0961, O0962, O0963, O0964, O0965 O0966, O1050, O1055,<br>O1061, O1070 O1081, O1091, O1092, O1093, O1100 O1110,<br>O1120, O1130, O1140, O1150 O1160, O1170, O1175, O1180                  |

Note: The 2019 Statistical Information Report for Major Surgical Statistics provided by the National Statistical Office was used (<http://kostat.go.kr/>). The report consisted of data on 33 surgeries, including 16 surgeries of international interest and 17 surgeries reflecting domestic conditions. Among them, 26 surgeries that either required general anesthesia or were considered commonly performed procedures were selected for the present study. The areas painted in gray indicate the surgeries selected in this study.

Table S2. Type of total claimed thromboembolism for each surgery

1

|                                                       | Type of thromboembolism* |   |     |    |        |       |       |       |     |    |    |    |    |    |       |        |    |    |    |     |    |     |    |    |    |     |     |    |    |     |     |     |    |       |     |       |       |       | Total  |        |
|-------------------------------------------------------|--------------------------|---|-----|----|--------|-------|-------|-------|-----|----|----|----|----|----|-------|--------|----|----|----|-----|----|-----|----|----|----|-----|-----|----|----|-----|-----|-----|----|-------|-----|-------|-------|-------|--------|--------|
|                                                       | 1                        | 2 | 3   | 4  | 5      | 6     | 7     | 8     | 9   | 10 | 11 | 12 | 13 | 14 | 15    | 16     | 17 | 18 | 19 | 20  | 21 | 22  | 23 | 24 | 25 | 26  | 27  | 28 | 29 | 30  | 31  | 32  | 33 | 34    | 35  | 36    | 37    | 38    |        |        |
| Total knee replacement                                | -                        | 1 | 92  | 10 | 4,060  | 1,356 | 325   | 1,232 | 5   | 1  | 3  | 1  | 2  | 3  | 673   | 3,241  | -  | 3  | -  | -   | -  | -   | -  | -  | 1  | -   | 12  | 9  | -  | 1   | 1   | 15  | 2  | -     | 321 | 4     | 231   | 2,194 | 12     | 13,811 |
| Hip replacement                                       | -                        | - | 24  | 11 | 1,635  | 428   | 100   | 474   | 15  | -  | 2  | 1  | 3  | 4  | 458   | 1,249  | 1  | 2  | -  | -   | -  | -   | -  | 3  | -  | 18  | 3   | -  | 2  | 10  | 2   | 4   | -  | 101   | 7   | 109   | 293   | 16    | 4,975  |        |
| Spine surgery                                         | 1                        | 2 | 110 | 17 | 3,337  | 1,064 | 677   | 1,995 | 33  | 1  | 2  | 2  | 11 | 9  | 472   | 6,338  | 7  | 3  | -  | -   | 1  | -   | -  | 7  | -  | 65  | 38  | 2  | 7  | 32  | 26  | 28  | -  | 298   | 42  | 397   | 758   | 75    | 15,856 |        |
| Coronary artery bypass graft                          | -                        | - | 33  | 1  | 90     | 9     | 3     | 23    | 2   | -  | -  | -  | -  | -  | 11    | 50     | 1  | -  | -  | -   | -  | -   | -  | -  | -  | 7   | -   | 1  | -  | 7   | 5   | 8   | -  | 15    | 10  | 20    | 35    | 12    | 343    |        |
| Partial hepatectomy                                   | -                        | - | 1   | 1  | 109    | 3     | 10    | 24    | 79  | -  | 2  | -  | 3  | -  | 48    | 109    | -  | -  | -  | -   | -  | -   | -  | -  | -  | 5   | 1   | -  | -  | 2   | 2   | -   | -  | 2     | 2   | 9     | 14    | 3     | 429    |        |
| Cardiac surgery (except coronary artery bypass graft) | -                        | - | 35  | 1  | 97     | 5     | 16    | 22    | 10  | -  | -  | -  | 3  | 1  | 8     | 77     | -  | -  | -  | -   | -  | -   | -  | 2  | -  | 9   | 2   | -  | -  | 3   | 14  | 4   | -  | 7     | 3   | 46    | 41    | 37    | 443    |        |
| Gastrectomy                                           | -                        | - | 5   | -  | 234    | 11    | 26    | 518   | 18  | -  | 1  | -  | 2  | 1  | 26    | 128    | 1  | 2  | -  | -   | -  | -   | -  | 1  | -  | 32  | 5   | -  | -  | 4   | 1   | 3   | -  | 13    | 9   | 33    | 36    | 4     | 1,114  |        |
| Hysterectomy                                          | -                        | - | 2   | 1  | 218    | 6     | 14    | 73    | 4   | -  | -  | -  | 4  | 4  | 70    | 254    | 2  | -  | -  | -   | -  | -   | -  | 2  | -  | 13  | -   | -  | 1  | 1   | -   | -   | -  | 10    | 2   | 10    | 15    | 8     | 714    |        |
| Endoscopic spine surgery                              | -                        | - | 4   | -  | 28     | 11    | 5     | 135   | -   | -  | 1  | -  | -  | 1  | 3     | 159    | -  | -  | -  | -   | -  | -   | -  | -  | -  | -   | 1   | -  | -  | 1   | 6   | -   | -  | 16    | 1   | 9     | 9     | 2     | 392    |        |
| Brain tumor surgery                                   | -                        | - | 3   | -  | 143    | 7     | 13    | 20    | 1   | -  | -  | -  | 4  | 1  | 16    | 46     | 3  | 4  | -  | -   | -  | -   | -  | 1  | -  | 4   | 2   | -  | 1  | 2   | 1   | -   | -  | 6     | 2   | 5     | 14    | 3     | 302    |        |
| Open prostatectomy                                    | -                        | - | 4   | -  | 20     | -     | 3     | 13    | 1   | -  | -  | -  | -  | -  | 6     | 11     | -  | -  | -  | -   | -  | -   | -  | -  | -  | -   | 1   | -  | -  | -   | -   | -   | -  | 2     | 1   | 7     | 11    | 1     | 81     |        |
| Cholecystectomy                                       | -                        | - | 26  | 3  | 608    | 48    | 123   | 240   | 61  | -  | 4  | -  | 5  | 6  | 119   | 648    | 5  | 2  | -  | 4   | -  | -   | -  | 3  | -  | 82  | 27  | 1  | 4  | 9   | 6   | 10  | -  | 54    | 18  | 155   | 206   | 34    | 2,511  |        |
| Transurethral prostatectomy                           | -                        | - | 7   | -  | 86     | 12    | 20    | 36    | 2   | -  | -  | -  | 2  | 2  | 18    | 57     | 1  | -  | -  | -   | -  | -   | -  | -  | -  | 7   | 2   | -  | -  | 3   | 1   | -   | -  | 4     | 7   | 26    | 45    | 4     | 342    |        |
| Skull base surgery                                    | -                        | - | -   | -  | 4      | 1     | 1     | 1     | -   | -  | -  | -  | -  | -  | -     | 3      | -  | -  | -  | -   | -  | -   | -  | -  | -  | -   | -   | -  | -  | -   | -   | -   | -  | -     | -   | -     | -     | -     | 10     |        |
| Cataract surgery                                      | 1                        | - | 300 | 31 | 2,199  | 590   | 675   | 1,144 | 78  | 3  | 24 | 1  | 16 | 35 | 635   | 2,083  | 36 | 18 | -  | 1   | -  | -   | -  | 23 | -  | 116 | 47  | 5  | 29 | 55  | 64  | 86  | 2  | 630   | 72  | 1,284 | 2,352 | 184   | 12,818 |        |
| Total mastectomy                                      | -                        | - | 13  | 1  | 72     | 9     | 45    | 35    | 1   | -  | -  | -  | -  | -  | 17    | 52     | -  | -  | -  | -   | -  | -   | -  | -  | -  | -   | -   | -  | 1  | -   | 1   | -   | -  | -     | -   | 13    | 19    | 1     | 280    |        |
| Repair of inguinal hernia                             | -                        | 1 | 21  | 3  | 108    | 27    | 54    | 86    | 25  | -  | -  | 1  | 2  | -  | 33    | 109    | 2  | 2  | -  | -   | -  | -   | -  | 5  | -  | 35  | 7   | -  | 2  | 1   | 1   | 1   | -  | 22    | 4   | 43    | 69    | 7     | 671    |        |
| Partial excision of mammary gland                     | -                        | - | 19  | 2  | 132    | 24    | 118   | 111   | 2   | -  | 1  | 1  | 1  | 1  | 23    | 74     | -  | 1  | -  | 3   | -  | -   | -  | -  | -  | 3   | 1   | -  | -  | 2   | 1   | 2   | -  | 8     | 1   | 22    | 32    | 1     | 586    |        |
| Appendectomy                                          | -                        | 1 | 30  | 2  | 159    | 27    | 145   | 153   | 18  | -  | 3  | 1  | 1  | 4  | 59    | 144    | 2  | -  | -  | 8   | -  | 4   | -  | 2  | -  | 69  | 12  | 1  | 2  | 3   | 3   | 3   | -  | 21    | 2   | 38    | 89    | 18    | 1,024  |        |
| Thyroidectomy                                         | -                        | - | 7   | -  | 93     | 12    | 24    | 54    | 1   | -  | -  | -  | 1  | -  | 13    | 53     | 1  | -  | -  | -   | -  | -   | -  | 1  | -  | 9   | 1   | -  | -  | -   | 1   | 3   | -  | 7     | -   | 23    | 41    | 6     | 351    |        |
| Sinus surgery                                         | -                        | - | 17  | 1  | 147    | 14    | 52    | 99    | 8   | 1  | 2  | 1  | -  | 5  | 39    | 93     | 1  | 3  | -  | 17  | -  | 17  | -  | 4  | -  | 8   | 4   | -  | 1  | 3   | -   | 4   | 1  | 21    | 3   | 152   | 139   | 10    | 867    |        |
| Endoscopic sinus surgery                              | -                        | - | 24  | 1  | 88     | 22    | 67    | 113   | 7   | -  | 3  | 1  | -  | 3  | 22    | 63     | -  | 3  | -  | 1   | -  | -   | -  | 12 | -  | 8   | 5   | 1  | -  | -   | 2   | 2   | -  | 17    | -   | 36    | 71    | 6     | 578    |        |
| Operation for hemorrhoid                              | -                        | - | 90  | 1  | 165    | 77    | 215   | 181   | 9   | 1  | 4  | 1  | 2  | 4  | 72    | 198    | 1  | 3  | -  | 4   | -  | 4   | -  | 2  | -  | 13  | 9   | 3  | 3  | 4   | 7   | 3   | -  | 35    | 5   | 78    | 184   | 23    | 1,401  |        |
| Cesarean section                                      | -                        | - | 11  | -  | 88     | 21    | 65    | 172   | 5   | 1  | 2  | -  | 1  | -  | 19    | 77     | 1  | 4  | 3  | 68  | 2  | 101 | 3  | -  | -  | 4   | 1   | -  | -  | 1   | -   | -   | -  | 1     | 8   | 8     | 12    | 5     | 684    |        |
| Cleft lip and/or palate surgery                       | -                        | - | -   | -  | -      | -     | -     | -     | -   | -  | -  | -  | -  | -  | -     | -      | -  | -  | -  | -   | -  | -   | -  | -  | -  | -   | -   | -  | -  | -   | -   | -   | -  | -     | -   | -     | 2     | -     | 2      |        |
| Tonsillectomy                                         | -                        | - | 6   | -  | 11     | 4     | 15    | 23    | 4   | -  | 1  | -  | -  | -  | 7     | 11     | 1  | -  | -  | -   | -  | -   | -  | -  | -  | -   | -   | -  | -  | 1   | -   | -   | -  | 3     | -   | 3     | 5     | 1     | 96     |        |
| Total                                                 | 2                        | 5 | 884 | 87 | 13,931 | 3,788 | 2,811 | 6,977 | 389 | 8  | 55 | 11 | 63 | 84 | 2,867 | 15,327 | 66 | 50 | 3  | 106 | 3  | 126 | 3  | 69 | -  | 519 | 178 | 14 | 54 | 145 | 159 | 163 | 3  | 1,614 | 203 | 2,757 | 6,686 | 473   | 60,681 |        |

Note: \*Types of thromboembolism corresponding to the numbers are listed in Table 3.

2

Table S3. Type of thromboembolism with anticoagulation treatment for each surgery

|                                                       | Type of thromboembolism* |   |     |   |       |     |     |     |    |    |    |    |    |    |     |       |    |    |    |    |    |    |    |    |    |    |    |    |    |    |    |    |    |     |    |     |     |     | Total |
|-------------------------------------------------------|--------------------------|---|-----|---|-------|-----|-----|-----|----|----|----|----|----|----|-----|-------|----|----|----|----|----|----|----|----|----|----|----|----|----|----|----|----|----|-----|----|-----|-----|-----|-------|
|                                                       | 1                        | 2 | 3   | 4 | 5     | 6   | 7   | 8   | 9  | 10 | 11 | 12 | 13 | 14 | 15  | 16    | 17 | 18 | 19 | 20 | 21 | 22 | 23 | 24 | 25 | 26 | 27 | 28 | 29 | 30 | 31 | 32 | 33 | 34  | 35 | 36  | 37  | 38  |       |
| Total knee replacement                                | -                        | - | 23  | 7 | 2,847 | 904 | 117 | 612 | 2  | -  | 2  | 1  | 1  | -  | 490 | 2,637 | -  | -  | -  | -  | -  | -  | -  | 1  | -  | 3  | -  | -  | -  | 1  | 8  | -  | -  | 169 | 2  | 71  | 91  | 6   | 7,995 |
| Hip replacement                                       | -                        | - | 9   | 9 | 1,178 | 165 | 51  | 297 | 11 | -  | 1  | 1  | 3  | 1  | 345 | 855   | -  | 1  | -  | -  | -  | -  | -  | 2  | -  | 6  | 1  | -  | -  | 6  | 1  | 2  | -  | 67  | 5  | 53  | 43  | 11  | 3,124 |
| Spine surgery                                         | 1                        | - | 8   | 7 | 1,306 | 78  | 45  | 237 | 7  | -  | 2  | -  | 5  | 3  | 138 | 1,183 | 1  | 1  | -  | -  | -  | -  | -  | -  | -  | 23 | 7  | 1  | -  | 8  | 5  | 8  | -  | 55  | 15 | 88  | 70  | 35  | 3,336 |
| Coronary artery bypass graft                          | -                        | - | 32  | - | 82    | 3   | 1   | 13  | -  | -  | -  | -  | -  | -  | 8   | 37    | 1  | -  | -  | -  | -  | -  | -  | -  | -  | 6  | -  | -  | -  | 7  | 5  | 3  | -  | 7   | 8  | 8   | 22  | 8   | 251   |
| Partial hepatectomy                                   | -                        | - | -   | 1 | 97    | 3   | 3   | 15  | 53 | -  | 1  | -  | 3  | -  | 42  | 95    | -  | -  | -  | -  | -  | -  | -  | -  | -  | 2  | 1  | -  | -  | 2  | 1  | -  | -  | -   | 1  | 5   | 4   | 2   | 331   |
| Cardiac surgery (except coronary artery bypass graft) | -                        | - | 34  | - | 90    | 2   | 12  | 20  | 7  | -  | -  | -  | 2  | 1  | 7   | 72    | -  | -  | -  | -  | -  | -  | -  | 1  | -  | 8  | 2  | -  | -  | 2  | 14 | 3  | -  | 7   | 3  | 39  | 30  | 30  | 386   |
| Gastrectomy                                           | -                        | - | 1   | - | 108   | 4   | 6   | 22  | 12 | -  | 1  | -  | -  | 1  | 20  | 76    | 1  | 1  | -  | -  | -  | -  | -  | -  | -  | 17 | 2  | -  | -  | 2  | -  | 1  | -  | 4   | 5  | 8   | 8   | 2   | 302   |
| Hysterectomy                                          | -                        | - | -   | - | 159   | 5   | 4   | 38  | 1  | -  | -  | -  | 4  | 3  | 67  | 234   | 1  | -  | -  | -  | -  | -  | -  | 1  | -  | 9  | -  | -  | -  | -  | -  | -  | -  | 2   | 1  | 3   | 3   | 5   | 540   |
| Endoscopic spine surgery                              | -                        | - | -   | - | 14    | -   | -   | -   | -  | -  | -  | -  | -  | -  | 1   | 7     | -  | -  | -  | -  | -  | -  | -  | -  | -  | -  | -  | -  | -  | -  | -  | -  | -  | -   | -  | -   | -   | 1   | 23    |
| Brain tumor surgery                                   | -                        | - | 1   | - | 103   | 5   | 5   | 6   | -  | -  | -  | -  | 3  | 1  | 7   | 31    | -  | 2  | -  | -  | -  | -  | -  | -  | -  | 1  | -  | -  | -  | 1  | -  | -  | -  | 2   | -  | -   | 3   | 2   | 173   |
| Open prostatectomy                                    | -                        | - | 2   | - | 14    | -   | -   | 2   | -  | -  | -  | -  | -  | -  | 2   | 2     | -  | -  | -  | -  | -  | -  | -  | -  | -  | -  | -  | -  | -  | -  | -  | -  | -  | -   | 1  | -   | -   | -   | 23    |
| Cholecystectomy                                       | -                        | - | 5   | 2 | 309   | 5   | 21  | 35  | 31 | -  | 1  | -  | 3  | 5  | 71  | 153   | 3  | 1  | -  | 1  | -  | -  | -  | 1  | -  | 53 | 7  | -  | -  | 2  | 3  | 3  | -  | 8   | 6  | 53  | 26  | 20  | 828   |
| Transurethral prostatectomy                           | -                        | - | 2   | - | 35    | -   | 1   | 5   | 1  | -  | -  | -  | 2  | 1  | 10  | 14    | -  | -  | -  | -  | -  | -  | -  | -  | -  | 2  | 1  | -  | -  | 1  | -  | -  | -  | 1   | 1  | 3   | 3   | 2   | 85    |
| Skull base surgery                                    | -                        | - | -   | - | 2     | -   | -   | -   | -  | -  | -  | -  | -  | -  | -   | 2     | -  | -  | -  | -  | -  | -  | -  | -  | -  | -  | -  | -  | -  | -  | -  | -  | -  | -   | -  | -   | -   | 4   |       |
| Cataract surgery                                      | 1                        | - | 18  | 3 | 926   | 97  | 44  | 144 | 21 | -  | 2  | -  | 8  | 2  | 222 | 462   | 9  | 3  | -  | -  | -  | -  | -  | 6  | -  | 39 | 8  | 1  | -  | 12 | 11 | 33 | -  | 62  | 21 | 113 | 126 | 94  | 2,487 |
| Total mastectomy                                      | -                        | - | 2   | 1 | 29    | 2   | 10  | 7   | -  | -  | -  | -  | -  | -  | 11  | 31    | -  | -  | -  | -  | -  | -  | -  | -  | -  | -  | -  | -  | -  | -  | 1  | -  | -  | -   | -  | 2   | 2   | -   | 98    |
| Repair of inguinal hernia                             | -                        | - | 3   | - | 42    | 6   | 5   | 9   | 5  | -  | -  | -  | 1  | -  | 13  | 27    | -  | -  | -  | -  | -  | -  | -  | 1  | -  | 11 | 1  | -  | -  | -  | -  | -  | -  | 11  | 1  | 5   | 10  | 2   | 153   |
| Partial excision of mammary gland                     | -                        | - | -   | - | 46    | 5   | 9   | 10  | 1  | -  | -  | -  | 1  | -  | 17  | 28    | -  | -  | -  | -  | -  | -  | -  | -  | -  | 1  | -  | -  | -  | -  | -  | 2  | -  | 1   | -  | 6   | 3   | -   | 130   |
| Appendectomy                                          | -                        | - | 4   | - | 96    | 4   | 8   | 11  | 11 | -  | 1  | -  | -  | 2  | 23  | 40    | -  | -  | -  | -  | -  | -  | -  | 1  | -  | 29 | 3  | -  | -  | -  | 1  | 1  | -  | 2   | 1  | 9   | 7   | 9   | 263   |
| Thyroidectomy                                         | -                        | - | -   | - | 45    | 1   | 1   | 4   | -  | -  | -  | -  | -  | -  | 4   | 11    | -  | -  | -  | -  | -  | -  | -  | -  | -  | 3  | -  | -  | -  | -  | -  | 1  | -  | 2   | -  | -   | 5   | 3   | 80    |
| Sinus surgery                                         | -                        | - | -   | - | 51    | 2   | 2   | 4   | 3  | -  | 1  | -  | -  | 1  | 12  | 16    | -  | -  | -  | -  | -  | -  | -  | 2  | -  | 3  | -  | -  | -  | -  | -  | 2  | -  | 1   | 1  | 7   | 4   | 3   | 115   |
| Endoscopic sinus surgery                              | -                        | - | 1   | 1 | 34    | 1   | 1   | 1   | 3  | -  | -  | -  | -  | -  | 8   | 11    | -  | 1  | -  | -  | -  | -  | -  | 4  | -  | -  | -  | -  | -  | -  | -  | 1  | -  | 1   | -  | 4   | 7   | 3   | 82    |
| Operation for hemorrhoid                              | -                        | - | 2   | - | 63    | 7   | 4   | 8   | 3  | -  | -  | -  | 1  | 1  | 13  | 30    | -  | -  | -  | -  | -  | -  | -  | -  | -  | 6  | -  | -  | 1  | -  | 1  | 1  | -  | -   | 2  | 5   | 7   | 3   | 158   |
| Cesarean section                                      | -                        | - | -   | - | 39    | -   | -   | 3   | 1  | 1  | -  | -  | 1  | -  | 5   | 12    | -  | 2  | -  | 1  | -  | 11 | 2  | -  | -  | 1  | -  | -  | -  | -  | -  | -  | -  | -   | -  | 1   | 3   | 1   | 84    |
| Cleft lip and/or palate surgery                       | -                        | - | -   | - | -     | -   | -   | -   | -  | -  | -  | -  | -  | -  | -   | -     | -  | -  | -  | -  | -  | -  | -  | -  | -  | -  | -  | -  | -  | -  | -  | -  | -  | -   | -  | 1   | -   | 1   |       |
| Tonsillectomy                                         | -                        | - | -   | - | 2     | -   | -   | 2   | 1  | -  | -  | -  | -  | -  | 2   | 1     | -  | -  | -  | -  | -  | -  | -  | -  | -  | -  | -  | -  | -  | -  | -  | -  | -  | -   | 1  | -   | -   | 9   |       |
| Total                                                 | 2                        | - | 147 | 5 | 1,373 | 125 | 84  | 203 | 49 | 1  | 4  | -  | 12 | 6  | 330 | 669   | 9  | 6  | -  | 1  | -  | 11 | 2  | 14 | -  | 93 | 12 | 1  | 1  | 12 | 14 | 41 | -  | 80  | 26 | 153 | 175 | 118 | 3,660 |

Note: \*Types of thromboembolism corresponding to the numbers are listed in Table 3.

Table S4. Baseline characteristics of the whole cohort and those of each surgery group

|                                                              | Total patients, n | Age  |      | Sex            |                | History of cancer, n(%) | Atrial fibrillation or atrial flutter, n(%) | History of thromboembolism, n(%) | Antiplatelet or anticoagulant drug use between 2 weeks and 3 months before surgery, n(%) | Antiplatelet or anticoagulant drug use on the day of surgery, n(%) |
|--------------------------------------------------------------|-------------------|------|------|----------------|----------------|-------------------------|---------------------------------------------|----------------------------------|------------------------------------------------------------------------------------------|--------------------------------------------------------------------|
|                                                              |                   | Mean | SD   | Male, n(%)     | Female, n(%)   |                         |                                             |                                  |                                                                                          |                                                                    |
| <b>Total knee replacement</b>                                | 108,111           | 71.8 | 6.9  | 17,715(16.39)  | 90,396(83.61)  | 1,746(1.62)             | 3(0.003)                                    | 974(0.09)                        | 21,152(19.57)                                                                            | 71,182(65.84)                                                      |
| <b>Hip replacement</b>                                       | 43,415            | 71.5 | 14.6 | 16,685(38.43)  | 26,730(61.57)  | 586(1.35)               | 1(0.002)                                    | 461(1.06)                        | 8,684(20.00)                                                                             | 22,946(52.85)                                                      |
| <b>Spine surgery</b>                                         | 265,317           | 65.3 | 15.1 | 12,609(42.44)  | 52,708(57.56)  | 3,598(1.36)             | 9(0.003)                                    | 1,881(0.71)                      | 42,685(16.09)                                                                            | 33,538(12.64)                                                      |
| <b>Coronary artery bypass graft</b>                          | 6,591             | 64.9 | 11.6 | 5,057(76.73)   | 1,534(23.27)   | 121(1.84)               | -                                           | 45(0.68)                         | 4,914(74.56)                                                                             | 6,589(99.97)                                                       |
| <b>Partial hepatectomy</b>                                   | 9,322             | 61.8 | 11.6 | 6,308(67.67)   | 3,014(32.33)   | 1,101(11.81)            | -                                           | 73(0.78)                         | 1,469(15.76)                                                                             | 4,196(45.01)                                                       |
| <b>Cardiac surgery (except coronary artery bypass graft)</b> | 10,296            | 41.6 | 29.7 | 5,315(51.62)   | 4,981(48.38)   | 99(0.96)                | 1(0.010)                                    | 87(0.84)                         | 4,383(42.57)                                                                             | 10,030(97.42)                                                      |
| <b>Gastrectomy</b>                                           | 27,203            | 62.7 | 12.3 | 17,702(65.07)  | 9,501(34.93)   | 714(2.62)               | 1(0.004)                                    | 126(0.46)                        | 3,614(13.29)                                                                             | 7,820(28.75)                                                       |
| <b>Hysterectomy</b>                                          | 20,831            | 54.5 | 11.8 | 1(0.00)        | 20,830(100)    | 579(2.78)               | 1(0.005)                                    | 80(0.38)                         | 1,339(6.43)                                                                              | 4,338(20.82)                                                       |
| <b>Endoscopic spine surgery</b>                              | 12,157            | 49.7 | 14.7 | 7,243(59.58)   | 4,914(40.42)   | 64(0.53)                | -                                           | 30(0.25)                         | 715(5.88)                                                                                | 167(1.37)                                                          |
| <b>Brain tumor surgery</b>                                   | 11,516            | 53.3 | 16.9 | 5,277(45.82)   | 6,239(54.18)   | 322(2.80)               | -                                           | 42(0.36)                         | 1,325(11.51)                                                                             | 5,008(43.49)                                                       |
| <b>Open prostatectomy</b>                                    | 3,387             | 69.6 | 6.3  | 3,387(100)     | -              | 3,273(96.63)            | -                                           | 25(0.74)                         | 755(22.29)                                                                               | 1,753(51.76)                                                       |
| <b>Cholecystectomy</b>                                       | 129,081           | 55.7 | 15.6 | 63,202(48.96)  | 65,879(51.04)  | 3,964(3.07)             | 2(0.002)                                    | 617(0.48)                        | 14,431(11.18)                                                                            | 12,744(9.87)                                                       |
| <b>Transurethral prostatectomy</b>                           | 18,547            | 71.2 | 8.6  | 18,544(99.98)  | 3(0.02)        | 1,919(10.35)            | -                                           | 119(0.64)                        | 3,860(20.81)                                                                             | 952(5.13)                                                          |
| <b>Skull base surgery</b>                                    | 674               | 52.5 | 14.3 | 245(36.35)     | 429(63.65)     | 14(2.08)                | -                                           | 2(0.30)                          | 76(11.28)                                                                                | 262(38.87)                                                         |
| <b>Cataract surgery</b>                                      | 907,397           | 68.6 | 10.8 | 378,772(41.74) | 528,625(58.26) | 14,867(1.64)            | 24(0.003)                                   | 5,971(0.66)                      | 160,729(17.71)                                                                           | 4,869(0.54)                                                        |
| <b>Total mastectomy</b>                                      | 22,091            | 45.4 | 16.4 | 7,628(34.53)   | 14,463(65.47)  | 453(2.05)               | -                                           | 41(0.19)                         | 1,070(4.84)                                                                              | 2,431(11.00)                                                       |
| <b>Repair of inguinal hernia</b>                             | 56,698            | 49.6 | 27.6 | 49,873(87.96)  | 6,825(12.04)   | 2,118(3.74)             | -                                           | 241(0.43)                        | 6,197(10.93)                                                                             | 653(1.15)                                                          |

|                                          |           |      |      |                      |                      |                  |               |                  |                    |                   |
|------------------------------------------|-----------|------|------|----------------------|----------------------|------------------|---------------|------------------|--------------------|-------------------|
| <b>Partial excision of mammary gland</b> | 63,033    | 48.3 | 12.8 | 345(0.55)            | 62,688(99.45)        | 1,804(2.86)      | -             | 119(0.19)        | 2,294(3.64)        | 1,488(2.36)       |
| <b>Appendectomy</b>                      | 137,344   | 39   | 19.9 | 73,537(53.54)        | 63,807(46.46)        | 942(0.69)        | -             | 233(0.17)        | 5,200(3.79)        | 1,527(1.11)       |
| <b>Thyroidectomy</b>                     | 51,506    | 48.9 | 13.3 | 13,006(25.25)        | 38,500(74.75)        | 35,361(68.65)    | 1(0.002)      | 97(0.19)         | 2,442(4.74)        | 1,609(3.12)       |
| <b>Sinus surgery</b>                     | 158,677   | 41.2 | 17.8 | 72,132(45.46)        | 86,545(54.54)        | 1,214(0.77)      | 1(0.001)      | 357(0.22)        | 6,205(3.91)        | 536(0.34)         |
| <b>Endoscopic sinus surgery</b>          | 109,454   | 40.7 | 17.4 | 74,926(68.45)        | 34,528(31.55)        | 773(0.71)        | -             | 158(0.14)        | 4,585(4.19)        | 1,049(0.96)       |
| <b>Operation for hemorrhoid</b>          | 303,456   | 45.6 | 15.0 | 162,403(53.52)       | 141,053(46.48)       | 2,299(0.76)      | 4(0.001)      | 476(0.16)        | 10,970(3.62)       | 297(0.10)         |
| <b>Cesarean section</b>                  | 255,600   | 33.3 | 4.4  | -                    | 255,600(100)         | 1,389(0.54)      | -             | 143(0.06)        | 1521(0.60)         | 593(0.23)         |
| <b>Cleft lip and/or palate surgery</b>   | 1,282     | 5.71 | 11.9 | 682(53.20)           | 600(46.80)           | 4(0.31)          | -             | 1(0.08)          | 10(0.78)           | 6(0.47)           |
| <b>Tonsillectomy</b>                     | 66,307    | 20.1 | 15.2 | 37,875(57.12)        | 28,432(42.88)        | 165(0.25)        | -             | 21(0.03)         | 369(0.56)          | 162(0.24)         |
| <b>Total</b>                             | 2,799,293 | 55   | 20   | 1,150,469<br>(41.10) | 1,648,824<br>(58.90) | 79,489<br>(2.84) | 48<br>(0.002) | 12,420<br>(0.44) | 310,994<br>(11.11) | 196,745<br>(7.03) |

Abbreviations: SD, standard deviation

**Table S5. Multivariate analysis of variables associated with postoperative thromboembolism events**

| Variables                                                                                     | Total claimed thromboembolism, n(%) |         | Thromboembolism with anticoagulant treatment, n(%) |         |
|-----------------------------------------------------------------------------------------------|-------------------------------------|---------|----------------------------------------------------|---------|
|                                                                                               | OR (95% CI)                         | p value | OR (95% CI)                                        | p value |
| Age                                                                                           | 1.014 (1.013, 1.015)                | <0.001  | 1.016 (1.015, 1.018)                               | <0.001  |
| Female vs. male                                                                               | 0.907 (0.887, 0.926)                | <0.001  | 0.907 (0.875, 0.941)                               | <0.001  |
| History of cancer vs. no                                                                      | 1.186 (1.109, 1.267)                | <0.001  | 1.303 (1.177, 1.444)                               | <0.001  |
| Atrial fibrillation or atrial flutter vs. no                                                  | 2.146 (0.506, 9.103)                | 0.300   | 3.698 (0.462, 29.635)                              | 0.218   |
| History of thromboembolism vs. no                                                             | >999 (<0.001, >999)                 | 1.000   | 49.578 (46.445, 52.923)                            | <0.001  |
| Antiplatelet or anticoagulant drug use between 2 weeks and 3 months before surgery vs. no use | 0.883 (0.86, 0.906)                 | <0.001  | 0.752 (0.723, 0.781)                               | <0.001  |
| Antiplatelet or anticoagulant drug use on the day of surgery vs. no use                       | 9.851 (9.569, 10.14)                | <0.001  | 82.653 (78.771, 86.726)                            | <0.001  |
| Prophylactic anticoagulant treatment vs. no use                                               | 0.052 (0.05, 0.054)                 | <0.001  | 0.030 (0.028, 0.031)                               | <0.001  |
| Type of surgery vs. reference category                                                        |                                     |         |                                                    |         |
| Total knee replacement                                                                        | 9.641 (8.412, 11.051)               | <0.001  | 5.516 (4.356, 6.984)                               | <0.001  |
| Hip replacement                                                                               | 7.990 (6.958, 9.175)                | <0.001  | 6.018 (4.745, 7.631)                               | <0.001  |
| Spine surgery                                                                                 | 4.887 (4.271, 5.592)                | <0.001  | 2.052 (1.621, 2.597)                               | <0.001  |
| Coronary artery bypass graft                                                                  | 7.695 (6.406, 9.242)                | <0.001  | 6.901 (5.242, 9.086)                               | <0.001  |
| Partial hepatectomy                                                                           | 3.876 (3.261, 4.607)                | <0.001  | 5.871 (4.498, 7.662)                               | <0.001  |
| Cardiac surgery (except coronary artery bypass graft)                                         | 7.932 (6.648, 9.463)                | <0.001  | 9.334 (7.16, 12.167)                               | <0.001  |
| Gastrectomy                                                                                   | 3.807 (3.282, 4.415)                | <0.001  | 2.111 (1.621, 2.748)                               | <0.001  |
| Hysterectomy                                                                                  | 3.793 (3.24, 4.44)                  | <0.001  | 9.437 (7.309, 12.184)                              | <0.001  |
| Endoscopic spine surgery                                                                      | 3.669 (3.094, 4.351)                | <0.001  | 0.87 (0.537, 1.41)                                 | 0.5726  |
| Brain tumor surgery                                                                           | 3.17 (2.639, 3.807)                 | <0.001  | 4.634 (3.485, 6.161)                               | <0.001  |
| Open prostatectomy                                                                            | 1.604 (1.184, 2.172)                | 0.002   | 0.935 (0.565, 1.549)                               | 0.795   |

|                                   |                      |        |                      |        |
|-----------------------------------|----------------------|--------|----------------------|--------|
| Cholecystectomy                   | 1.533 (1.331, 1.766) | <0.001 | 1.49 (1.167, 1.901)  | 0.001  |
| Skull base surgery                | 1.754 (0.86, 3.576)  | 0.122  | 1.869 (0.595, 5.867) | 0.284  |
| Cataract surgery                  | 0.742 (0.648, 0.849) | <0.001 | 1.098 (0.867, 1.39)  | 0.438  |
| Total mastectomy                  | 1.456 (1.208, 1.754) | <0.001 | 2.058 (1.503, 2.818) | <0.001 |
| Repair of inguinal hernia         | 0.873 (0.741, 1.029) | 0.105  | 1.339 (1.007, 1.78)  | 0.044  |
| Partial excision of mammary gland | 0.992 (0.842, 1.168) | 0.922  | 1.229 (0.913, 1.655) | 0.174  |
| Appendectomy                      | 0.816 (0.7, 0.95)    | 0.009  | 1.323 (1.014, 1.726) | 0.039  |
| Thyroidectomy                     | 0.561 (0.465, 0.677) | <0.001 | 0.659 (0.472, 0.921) | 0.0147 |
| Sinus surgery                     | 0.446 (0.38, 0.524)  | <0.001 | 0.418 (0.308, 0.568) | <0.001 |
| Endoscopic sinus surgery          | 0.523 (0.443, 0.617) | <0.001 | 0.484 (0.351, 0.669) | <0.001 |
| Operation for hemorrhoid          | 0.403 (0.347, 0.468) | <0.001 | 0.387 (0.292, 0.513) | <0.001 |
| Cesarean section                  | 0.356 (0.303, 0.419) | <0.001 | 0.358 (0.259, 0.494) | <0.001 |
| Cleft lip and/or palate surgery   | 0.177 (0.025, 1.264) | 0.0843 | 0.983 (0.133, 7.264) | 0.9863 |
| Tonsillectomy                     | 0.21 (0.161, 0.274)  | <0.001 | 0.161 (0.08, 0.323)  | <0.001 |

---

Abbreviations: OR, odds ratio; CI, confidence interval
